# Supplementary material for: Crystal structure of the full Swi2/Snf2 remodeler Mot1 in the resting state
Source: eLife. 2018 Oct 5;7:e37774. doi: 10.7554/eLife.37774 (PMC6188472; doi:10.7554/eLife.37774)
Supplement: Figure 2—source data 1. [file elife-37774-fig2-data1.xlsx]

## Sheet: Sheet2
Application: Tecan i-control				Tecan i-control , 1.10.4.0
Device: infinite M1000				Serial number: 901004747
Firmware: V_1.35_08/2010_S3F (Aug 11 2010/09.36.01)				MAI, V_1.35_08/2010_S3F (Aug 11 2010/09.36.01)
Date:	2016-07-12
Time:	5:50:54 PM
System				TECANM1000
User				GCM\butryn
Plate				Greiner 96 Flat Bottom Transparent Polystyrol [GRE96ft_half area.pdfx]
Plate-ID (Stacker)
List of actions in this measurement script:
Kinetic
Absorbance
Label: Label1			Wait (Plate)				On	Target Temperature: 37 °C
Kinetic Measurement
Kinetic duration				01:00:00
Interval Time				00:00:20
Mode				Absorbance
Wavelength				340	nm
Number of Flashes				25
Settle Time				10	ms
Part of Plate				A1-F12; G1-G4
Start Time:	7/12/2016 5:51:03 PM
Cycle Nr.	1	2	3	4	5	6	7	8	9	10	11	12	13	14	15	16	17	18	19	20	21	22	23	24	25	26	27	28	29	30	31	32	33	34	35	36	37	38	39	40	41	42	43	44	45	46	47	48	49
Time [s]	0	20	40	60	80	100	120	140	160	180	200	220	240	260	280	300	320	340	360	380	400	420	440	460	480	500	520	540	560	580	600	620	640	660	680	700	720	740	760	780	800	820	840	860.1	880.1	900	920.1	940	960
	0.7651	0.7414	0.7336	0.7248	0.7176	0.7107	0.7024	0.6927	0.6826	0.6704	0.6591	0.6487	0.6394	0.6299	0.6202	0.6115	0.6012	0.5943	0.5835	0.5751	0.5661	0.5557	0.5446	0.5353	0.5251	0.5142	0.5039	0.4924	0.4817	0.4718	0.4603	0.4493	0.438	0.4271	0.4158	0.4046	0.3923	0.3823	0.3689	0.3586	0.3462	0.335	0.3221	0.311	0.298	0.2871	0.2747	0.2638	0.2514
	0.7572	0.7267	0.7113	0.7005	0.6893	0.6803	0.669	0.6562	0.6434	0.6272	0.6129	0.5952	0.5772	0.5598	0.5411	0.5265	0.5096	0.4946	0.4778	0.462	0.4455	0.4269	0.4089	0.3919	0.374	0.3549	0.3367	0.318	0.2973	0.2775	0.2589	0.2376	0.2169	0.1962	0.1761	0.1557	0.1348	0.1157	0.0959	0.0791	0.0692	0.0642	0.0625	0.0617	0.0608	0.0605	0.0597	0.0608	0.0608
	0.7164	0.6959	0.6797	0.6668	0.6538	0.6426	0.6288	0.615	0.5999	0.5826	0.5639	0.544	0.5248	0.5047	0.4859	0.469	0.4504	0.4319	0.4123	0.3947	0.3749	0.3543	0.333	0.3134	0.293	0.2715	0.25	0.228	0.2045	0.1821	0.1609	0.1372	0.1148	0.0945	0.0785	0.072	0.069	0.0681	0.0672	0.0665	0.0665	0.0664	0.0665	0.0652	0.0652	0.0647	0.0655	0.0655	0.0662
	0.7049	0.6812	0.6647	0.6514	0.6396	0.6259	0.6104	0.5948	0.5761	0.557	0.5372	0.5174	0.4994	0.4811	0.4633	0.4467	0.429	0.4108	0.3917	0.3751	0.3547	0.3355	0.3147	0.2952	0.2746	0.2541	0.2336	0.2114	0.1898	0.1682	0.1463	0.1249	0.1037	0.0853	0.0731	0.0693	0.0663	0.0662	0.0646	0.0653	0.0658	0.0651	0.0659	0.0648	0.0648	0.0647	0.0637	0.0657	0.066
	0.8403	0.8157	0.8053	0.8001	0.7967	0.7951	0.7926	0.7907	0.7864	0.7833	0.7805	0.7757	0.773	0.7706	0.7688	0.7677	0.7675	0.7659	0.764	0.7664	0.7642	0.7636	0.7624	0.7626	0.7622	0.7616	0.7621	0.7594	0.7594	0.7594	0.7589	0.7581	0.757	0.7563	0.7559	0.7551	0.7544	0.7538	0.7523	0.7524	0.7526	0.7516	0.7516	0.7505	0.7484	0.7481	0.7476	0.7472	0.747
	0.831	0.8069	0.7948	0.7883	0.7839	0.7817	0.7791	0.7757	0.7722	0.768	0.7651	0.7609	0.7595	0.7579	0.7547	0.7544	0.753	0.7517	0.7506	0.7516	0.7509	0.7498	0.7485	0.7486	0.7488	0.7478	0.7466	0.7469	0.7448	0.7448	0.7449	0.7437	0.7422	0.7425	0.7416	0.7414	0.7398	0.7404	0.7383	0.738	0.7371	0.7364	0.7373	0.735	0.7348	0.734	0.7335	0.7328	0.7321
	0.7965	0.7741	0.7673	0.7599	0.7544	0.7503	0.7443	0.7398	0.733	0.7255	0.7182	0.7095	0.7006	0.6897	0.6801	0.6741	0.6668	0.6591	0.6521	0.6458	0.6377	0.6299	0.6217	0.6134	0.6053	0.5947	0.5863	0.5776	0.5658	0.5572	0.547	0.5362	0.5243	0.5143	0.5035	0.4929	0.4797	0.4686	0.4559	0.4437	0.432	0.4181	0.4071	0.3935	0.3795	0.367	0.3526	0.3404	0.3274
	0.6962	0.6615	0.6395	0.6195	0.5989	0.5758	0.5518	0.5286	0.5029	0.4779	0.4538	0.4272	0.4023	0.3738	0.3461	0.318	0.2877	0.2578	0.2262	0.1954	0.1634	0.1311	0.1002	0.0755	0.0652	0.0622	0.062	0.0616	0.0606	0.0613	0.0616	0.0602	0.0609	0.0608	0.0608	0.0616	0.0605	0.0622	0.0617	0.0618	0.0631	0.0627	0.0633	0.0628	0.0624	0.0635	0.0627	0.0643	0.0647
	0.7907	0.7511	0.7351	0.7243	0.7121	0.7037	0.6927	0.6838	0.6777	0.6676	0.6591	0.6529	0.6465	0.6366	0.6279	0.6166	0.6039	0.5928	0.5766	0.5619	0.5469	0.5321	0.518	0.5061	0.4937	0.4817	0.4698	0.4568	0.4452	0.4337	0.4209	0.4081	0.3963	0.3841	0.3707	0.3588	0.3444	0.3328	0.3186	0.307	0.293	0.2797	0.2658	0.2529	0.239	0.226	0.213	0.1998	0.1859
	0.7766	0.7413	0.7208	0.7026	0.683	0.6704	0.6557	0.6421	0.6334	0.6199	0.6082	0.5988	0.5861	0.5693	0.5518	0.5337	0.5136	0.4952	0.4748	0.4556	0.438	0.4193	0.402	0.3852	0.368	0.3504	0.3329	0.3147	0.296	0.2775	0.2596	0.2404	0.221	0.2016	0.1829	0.1649	0.1441	0.1261	0.1063	0.0893	0.0754	0.0666	0.0637	0.0625	0.0612	0.061	0.06	0.061	0.061
	0.8413	0.7754	0.752	0.7282	0.7107	0.6975	0.6789	0.6639	0.6517	0.6331	0.6182	0.6067	0.5911	0.5714	0.5557	0.5399	0.5225	0.5068	0.4895	0.4748	0.4569	0.4377	0.4172	0.3961	0.3749	0.3494	0.3235	0.2965	0.2685	0.2421	0.2177	0.1945	0.1713	0.1496	0.1276	0.109	0.0931	0.0846	0.0808	0.0799	0.0793	0.0785	0.0786	0.0776	0.0769	0.0769	0.0772	0.0776	0.0782
	0.7955	0.7606	0.7382	0.7159	0.6977	0.681	0.6644	0.6493	0.6366	0.6207	0.6054	0.5941	0.581	0.5628	0.546	0.525	0.5034	0.4823	0.4582	0.4357	0.4106	0.3893	0.368	0.3484	0.328	0.3079	0.2879	0.2666	0.2464	0.2254	0.2043	0.1836	0.1618	0.1408	0.1198	0.1012	0.0824	0.0722	0.0668	0.0663	0.0656	0.0645	0.0652	0.0642	0.0639	0.0635	0.0628	0.0643	0.0647
	0.8617	0.8309	0.8153	0.8053	0.7984	0.7926	0.7885	0.7852	0.783	0.7805	0.78	0.7798	0.779	0.7742	0.771	0.7666	0.7611	0.7551	0.7502	0.7508	0.7492	0.7473	0.7458	0.7462	0.7456	0.7449	0.7454	0.743	0.743	0.7431	0.7418	0.7416	0.7406	0.7398	0.7391	0.7387	0.7376	0.7373	0.7353	0.7356	0.7355	0.7334	0.7336	0.7327	0.731	0.7306	0.7293	0.7292	0.7291
	0.8418	0.8157	0.8025	0.7952	0.7891	0.7845	0.7795	0.7771	0.7753	0.7729	0.7726	0.7717	0.7707	0.7675	0.7627	0.759	0.7524	0.7473	0.7434	0.7425	0.7409	0.7386	0.7375	0.738	0.7389	0.7382	0.7372	0.7373	0.7356	0.736	0.735	0.735	0.7357	0.7351	0.7326	0.7325	0.7309	0.7319	0.729	0.7288	0.7279	0.7267	0.7273	0.7256	0.7254	0.7243	0.7237	0.723	0.7221
	0.8571	0.8346	0.8209	0.8089	0.7984	0.7885	0.7803	0.775	0.7695	0.7652	0.7606	0.7571	0.7547	0.7475	0.7418	0.7332	0.7237	0.7154	0.7109	0.694	0.6822	0.6707	0.6606	0.6514	0.6436	0.6351	0.6285	0.6203	0.619	0.6023	0.5923	0.5834	0.573	0.5638	0.5536	0.5536	0.533	0.523	0.5183	0.501	0.4909	0.4776	0.4676	0.4555	0.4426	0.4316	0.4183	0.4079	0.3959
	0.7606	0.7174	0.6904	0.6675	0.6471	0.624	0.6031	0.5819	0.5597	0.5392	0.5165	0.4922	0.471	0.4436	0.4123	0.3804	0.345	0.3097	0.2739	0.2406	0.2068	0.1737	0.1414	0.111	0.0838	0.0677	0.0644	0.0627	0.0618	0.0618	0.0619	0.0609	0.0615	0.061	0.0612	0.0618	0.0607	0.0618	0.0613	0.0614	0.0622	0.0616	0.0625	0.0622	0.0615	0.0624	0.0615	0.0629	0.063
	0.8061	0.7784	0.7667	0.7553	0.7424	0.7336	0.7232	0.7146	0.7083	0.6986	0.6906	0.6835	0.6762	0.6656	0.6543	0.6416	0.627	0.6165	0.6017	0.5891	0.5768	0.5641	0.5512	0.5403	0.5287	0.5163	0.5048	0.4928	0.4808	0.4703	0.4575	0.4454	0.4333	0.4214	0.4084	0.3963	0.3828	0.3716	0.3575	0.3456	0.3325	0.3194	0.3056	0.2934	0.2794	0.2667	0.253	0.241	0.2274
	0.7872	0.7563	0.7388	0.7231	0.7074	0.6968	0.685	0.6727	0.6633	0.6507	0.6403	0.628	0.614	0.5976	0.5785	0.5623	0.5435	0.5271	0.5093	0.4931	0.4775	0.4605	0.444	0.4287	0.4125	0.3959	0.3793	0.3623	0.3442	0.3267	0.3096	0.2915	0.2731	0.2547	0.2368	0.2183	0.1996	0.1819	0.1626	0.1437	0.1275	0.1104	0.0983	0.0923	0.0894	0.0884	0.087	0.0881	0.0882
	0.7875	0.7572	0.7391	0.7234	0.7067	0.6954	0.6788	0.6651	0.6533	0.6393	0.6269	0.6148	0.6005	0.582	0.5649	0.5458	0.5246	0.5038	0.4814	0.4617	0.4421	0.4217	0.4017	0.384	0.3657	0.3464	0.3258	0.3063	0.285	0.2651	0.2441	0.2232	0.2011	0.1804	0.1588	0.1388	0.1191	0.1027	0.0928	0.0888	0.0879	0.0876	0.0876	0.0866	0.0859	0.0874	0.0872	0.0877	0.0885
	0.7926	0.7578	0.7365	0.7171	0.7018	0.6874	0.6716	0.6579	0.6448	0.6316	0.619	0.6058	0.5909	0.5731	0.5541	0.5349	0.5133	0.4912	0.4694	0.4517	0.4313	0.4132	0.3938	0.3758	0.3573	0.3382	0.3194	0.2993	0.2793	0.2596	0.2389	0.219	0.1973	0.1772	0.1563	0.1369	0.1167	0.1006	0.0889	0.0854	0.0846	0.0832	0.0833	0.0822	0.0824	0.0824	0.0813	0.0831	0.0831
	0.8437	0.8227	0.811	0.8031	0.7966	0.7928	0.7888	0.7862	0.784	0.7839	0.7833	0.7816	0.7813	0.7799	0.7778	0.7746	0.7715	0.7669	0.7626	0.7628	0.7592	0.7578	0.7564	0.7564	0.7561	0.7557	0.7568	0.754	0.754	0.7544	0.7535	0.7531	0.7514	0.7512	0.7504	0.7495	0.7492	0.7486	0.7467	0.7462	0.7467	0.7449	0.7451	0.7441	0.742	0.7418	0.7409	0.7405	0.7405
	0.8312	0.8138	0.8077	0.8041	0.8007	0.799	0.7963	0.7931	0.7887	0.7833	0.7804	0.7763	0.7737	0.7714	0.7683	0.7693	0.7678	0.7671	0.7658	0.7669	0.7668	0.7656	0.7645	0.7643	0.7651	0.7637	0.7622	0.7629	0.761	0.7612	0.7601	0.7601	0.7584	0.7589	0.7582	0.7579	0.7569	0.7576	0.7551	0.7554	0.7543	0.7535	0.7538	0.7522	0.7518	0.7514	0.7507	0.7505	0.7502
	0.8327	0.8077	0.7949	0.7869	0.7799	0.7732	0.7682	0.7641	0.7589	0.7538	0.7478	0.7398	0.7322	0.7224	0.7136	0.7087	0.7008	0.693	0.6864	0.6806	0.6735	0.6669	0.66	0.653	0.6465	0.6373	0.6302	0.6232	0.613	0.6059	0.5968	0.5884	0.5778	0.5694	0.56	0.5505	0.5396	0.5304	0.5191	0.5087	0.4986	0.4862	0.4768	0.4647	0.4527	0.4413	0.4284	0.4181	0.4069
	0.7671	0.7308	0.7028	0.6816	0.6623	0.6422	0.622	0.6024	0.5807	0.5582	0.5339	0.5055	0.4778	0.4475	0.4176	0.3895	0.3592	0.3303	0.3007	0.2726	0.2436	0.2132	0.1842	0.1551	0.1267	0.1027	0.0934	0.0911	0.0895	0.09	0.0901	0.0889	0.0896	0.0895	0.0894	0.0897	0.0886	0.0907	0.0899	0.0893	0.0915	0.0908	0.0911	0.0909	0.0905	0.0912	0.0905	0.0918	0.0922
	0.7524	0.7403	0.7331	0.7265	0.7196	0.7151	0.71	0.7052	0.7021	0.6961	0.6909	0.6844	0.677	0.6676	0.6585	0.6502	0.6412	0.6356	0.6273	0.6219	0.6159	0.609	0.6015	0.5965	0.5892	0.582	0.5759	0.5686	0.5615	0.5556	0.548	0.5406	0.5336	0.5269	0.5192	0.5122	0.5039	0.4976	0.4887	0.4817	0.474	0.4664	0.4578	0.4509	0.4422	0.4347	0.4268	0.4194	0.4111
	0.7784	0.7475	0.736	0.729	0.718	0.7127	0.7041	0.6972	0.6939	0.6858	0.6816	0.678	0.6722	0.6641	0.6554	0.6449	0.6314	0.6192	0.6049	0.592	0.58	0.5671	0.5565	0.5476	0.5383	0.5286	0.5196	0.5101	0.499	0.4889	0.4792	0.4682	0.4574	0.4465	0.4357	0.4247	0.4128	0.4028	0.3908	0.3789	0.368	0.3558	0.3439	0.3321	0.3197	0.3079	0.295	0.2843	0.2724
	0.7848	0.7575	0.744	0.7317	0.7178	0.7103	0.6995	0.6908	0.6855	0.6776	0.671	0.6648	0.6584	0.6482	0.6375	0.6263	0.6109	0.5946	0.5772	0.5627	0.548	0.5339	0.5213	0.511	0.4998	0.4884	0.4763	0.4646	0.4506	0.4389	0.4265	0.4138	0.4011	0.3883	0.3754	0.363	0.3491	0.3358	0.3219	0.308	0.2949	0.2814	0.2676	0.2527	0.238	0.2247	0.2103	0.1965	0.1827
	0.797	0.7572	0.7441	0.7312	0.7227	0.7148	0.7052	0.6969	0.6897	0.68	0.6721	0.6658	0.6584	0.6488	0.6396	0.632	0.6226	0.6118	0.5996	0.5896	0.5756	0.5628	0.5491	0.537	0.5245	0.513	0.5021	0.4905	0.4788	0.4677	0.4556	0.445	0.4332	0.4218	0.4096	0.3987	0.3856	0.3744	0.3611	0.3491	0.3377	0.3239	0.3116	0.2984	0.2855	0.2722	0.2585	0.2474	0.2345
	0.8029	0.765	0.7497	0.7411	0.7313	0.7256	0.7178	0.7117	0.7069	0.7025	0.6976	0.6927	0.689	0.6849	0.679	0.6725	0.6664	0.6584	0.6481	0.6414	0.6313	0.6219	0.6128	0.6059	0.5988	0.592	0.5866	0.579	0.5731	0.5671	0.5604	0.5539	0.5473	0.5406	0.5339	0.5274	0.52	0.5136	0.506	0.4993	0.4931	0.4857	0.479	0.4718	0.4633	0.4562	0.449	0.4424	0.4353
	0.7599	0.73	0.7106	0.6982	0.6866	0.6779	0.6688	0.6604	0.652	0.641	0.63	0.6158	0.6036	0.5916	0.5775	0.5663	0.5528	0.5396	0.5266	0.516	0.5036	0.4906	0.4778	0.4663	0.4546	0.4409	0.4277	0.4157	0.4011	0.3886	0.3748	0.3611	0.3467	0.3334	0.3191	0.3051	0.2898	0.2764	0.2604	0.246	0.2305	0.2152	0.2009	0.185	0.1695	0.1541	0.1391	0.1241	0.1093
	0.7893	0.7493	0.7315	0.7167	0.7035	0.692	0.6797	0.6691	0.6588	0.6488	0.6395	0.628	0.6147	0.5979	0.5804	0.5652	0.5472	0.5297	0.5137	0.5002	0.4852	0.4712	0.4574	0.4439	0.4301	0.4145	0.4007	0.387	0.3699	0.3561	0.3402	0.3247	0.3078	0.2926	0.2763	0.2601	0.2423	0.2264	0.2086	0.1918	0.1751	0.1569	0.1414	0.1236	0.1059	0.0903	0.0758	0.0675	0.0638
	0.7427	0.7224	0.7111	0.7037	0.6965	0.69	0.6815	0.674	0.6649	0.6554	0.6471	0.6362	0.627	0.6165	0.6077	0.5996	0.589	0.5804	0.571	0.5629	0.5538	0.5439	0.535	0.5265	0.5173	0.5075	0.4988	0.4892	0.4785	0.4692	0.4597	0.4483	0.4388	0.4283	0.4178	0.4078	0.3959	0.3864	0.3749	0.3635	0.3539	0.3424	0.3315	0.3196	0.3075	0.2969	0.2845	0.2741	0.2625
	0.856	0.8282	0.8182	0.8125	0.8069	0.8003	0.7953	0.7919	0.7888	0.7857	0.7837	0.7811	0.7808	0.7802	0.7763	0.776	0.7715	0.7648	0.7594	0.757	0.7529	0.7496	0.7472	0.7466	0.7466	0.7453	0.7455	0.7444	0.7425	0.7443	0.7428	0.7423	0.742	0.7424	0.7417	0.7419	0.7393	0.7401	0.7382	0.738	0.7383	0.737	0.7356	0.7353	0.7341	0.7338	0.7333	0.7333	0.7325
	0.8097	0.7888	0.777	0.7702	0.7628	0.7573	0.7518	0.7472	0.7453	0.7415	0.7406	0.7364	0.733	0.7281	0.7229	0.7182	0.7115	0.7051	0.7	0.6971	0.6938	0.6915	0.6894	0.6889	0.6872	0.6858	0.6852	0.6833	0.6807	0.6803	0.6791	0.677	0.6758	0.6756	0.6739	0.6727	0.6691	0.6691	0.6661	0.6648	0.6641	0.6616	0.6607	0.6577	0.6557	0.6537	0.6528	0.6507	0.6492
	0.7839	0.7733	0.7642	0.7581	0.7522	0.7486	0.742	0.7368	0.7337	0.7283	0.7249	0.7179	0.7127	0.7072	0.6995	0.6935	0.6874	0.6824	0.678	0.6743	0.6711	0.6656	0.6624	0.6609	0.6569	0.6528	0.6501	0.6473	0.6425	0.6396	0.6353	0.6311	0.6276	0.6234	0.6189	0.6151	0.6112	0.6072	0.6024	0.5985	0.5945	0.5902	0.586	0.5815	0.5766	0.5715	0.567	0.5634	0.5585
	0.7436	0.7343	0.7291	0.724	0.7174	0.7116	0.7052	0.7002	0.6946	0.6888	0.6846	0.6808	0.6868	0.6832	0.6795	0.6765	0.6742	0.6713	0.6667	0.6552	0.6524	0.6486	0.6458	0.6441	0.6401	0.6371	0.6345	0.631	0.6266	0.6242	0.6206	0.6165	0.6131	0.6099	0.6059	0.6031	0.5988	0.5955	0.5903	0.5865	0.5838	0.5797	0.5757	0.5718	0.5666	0.5626	0.5589	0.5557	0.5516
	0.7766	0.7564	0.7457	0.7382	0.7305	0.7242	0.7165	0.7099	0.7015	0.6939	0.6864	0.6767	0.6698	0.6618	0.6542	0.6484	0.6428	0.6362	0.6297	0.6244	0.6178	0.6113	0.6043	0.5995	0.5927	0.5862	0.5803	0.5736	0.5659	0.5593	0.5524	0.5454	0.5379	0.5304	0.5242	0.5168	0.5081	0.5021	0.494	0.487	0.4796	0.4715	0.4645	0.4568	0.4487	0.4414	0.4324	0.4257	0.4176
	0.7543	0.7453	0.7373	0.731	0.7236	0.7141	0.7051	0.6941	0.6824	0.6734	0.6631	0.6525	0.6434	0.6344	0.6253	0.6177	0.6094	0.6008	0.5923	0.5845	0.5752	0.5657	0.5565	0.548	0.5391	0.5293	0.5203	0.5104	0.4998	0.4899	0.4802	0.4688	0.4579	0.4476	0.4369	0.4272	0.4149	0.4043	0.3923	0.3818	0.3707	0.3586	0.3473	0.3352	0.3229	0.3124	0.2991	0.2881	0.2764
	0.7573	0.7461	0.7397	0.7323	0.7237	0.7129	0.7025	0.691	0.6771	0.6629	0.6506	0.6351	0.6234	0.612	0.5997	0.5897	0.5795	0.5703	0.5595	0.5502	0.539	0.5283	0.5174	0.5069	0.4967	0.4844	0.4731	0.4599	0.4479	0.436	0.424	0.4108	0.3982	0.3847	0.3719	0.3594	0.3439	0.332	0.3177	0.3042	0.2901	0.2772	0.263	0.249	0.2343	0.2197	0.2055	0.1923	0.1777
	0.7435	0.7374	0.7287	0.7182	0.7089	0.6975	0.6895	0.6801	0.6729	0.6649	0.6557	0.6466	0.639	0.6303	0.6206	0.6119	0.6042	0.5948	0.5851	0.5774	0.5677	0.5565	0.5462	0.5362	0.5272	0.5162	0.5057	0.4946	0.4833	0.4729	0.4613	0.4486	0.4372	0.4256	0.4138	0.4031	0.3886	0.3771	0.3651	0.3525	0.3394	0.327	0.3148	0.3014	0.2886	0.2745	0.2617	0.25	0.2363
	0.7354	0.7263	0.7185	0.7126	0.7081	0.7022	0.6973	0.6904	0.6861	0.682	0.6776	0.6727	0.6683	0.6629	0.6571	0.653	0.6475	0.6415	0.636	0.6321	0.6262	0.6204	0.614	0.6093	0.6036	0.5973	0.5922	0.5844	0.5784	0.5716	0.5651	0.5589	0.5517	0.5452	0.5395	0.5332	0.5257	0.5183	0.5116	0.5041	0.4978	0.4907	0.4841	0.4763	0.4684	0.4616	0.4539	0.4471	0.4398
	0.7334	0.7185	0.7063	0.6962	0.6863	0.6751	0.665	0.6556	0.6455	0.6361	0.6261	0.6152	0.6066	0.5954	0.5839	0.5746	0.5623	0.5526	0.5408	0.5302	0.519	0.5072	0.4946	0.4832	0.4712	0.4592	0.4454	0.4314	0.4193	0.4064	0.3927	0.3783	0.3649	0.3511	0.3362	0.3232	0.3077	0.2942	0.2778	0.2632	0.2492	0.2343	0.219	0.2036	0.1872	0.1726	0.1581	0.1431	0.1275
	0.7773	0.7604	0.7489	0.7397	0.73	0.7223	0.7114	0.7022	0.6929	0.6809	0.6712	0.6593	0.6465	0.6306	0.6138	0.5973	0.5801	0.5641	0.5475	0.5335	0.5185	0.5038	0.4899	0.4761	0.463	0.4468	0.4327	0.4175	0.4015	0.3878	0.3716	0.3559	0.3385	0.3222	0.3063	0.2907	0.2724	0.2572	0.2391	0.2221	0.2056	0.1881	0.1707	0.1527	0.1357	0.1189	0.1029	0.0898	0.0802
	0.7289	0.7196	0.7129	0.7086	0.7007	0.6936	0.6854	0.6787	0.67	0.6635	0.6564	0.6476	0.6421	0.6336	0.6267	0.6198	0.6121	0.604	0.5949	0.5895	0.5799	0.5705	0.5615	0.5537	0.5444	0.5358	0.5267	0.5166	0.5061	0.4972	0.4858	0.4771	0.4673	0.4559	0.4462	0.4368	0.4253	0.4149	0.4036	0.3933	0.3817	0.3715	0.3598	0.3497	0.3368	0.3263	0.3146	0.3037	0.2928
	0.7796	0.7703	0.7655	0.7615	0.7589	0.7563	0.7531	0.7505	0.7489	0.7452	0.7427	0.7399	0.7362	0.7341	0.7302	0.7297	0.7263	0.726	0.7238	0.7247	0.7225	0.7215	0.7207	0.7207	0.7195	0.7181	0.718	0.7176	0.7163	0.7167	0.7166	0.7154	0.714	0.7137	0.713	0.7126	0.7119	0.7117	0.7103	0.7101	0.7102	0.7096	0.7093	0.7079	0.7074	0.707	0.7063	0.7071	0.7053
	0.7558	0.7516	0.7412	0.7387	0.7346	0.7285	0.7245	0.7205	0.717	0.7128	0.712	0.7096	0.7086	0.7071	0.7051	0.7039	0.7023	0.7017	0.6995	0.6996	0.6976	0.6963	0.6943	0.6939	0.6941	0.6911	0.6903	0.6885	0.6858	0.6851	0.6849	0.6827	0.6809	0.6786	0.6782	0.6774	0.6744	0.6736	0.6705	0.6687	0.6679	0.6661	0.6649	0.662	0.6598	0.6593	0.6567	0.6543	0.6535
	0.7763	0.7705	0.7639	0.7591	0.7549	0.7528	0.7479	0.7438	0.7395	0.7329	0.7281	0.7212	0.7139	0.7087	0.7005	0.6969	0.6912	0.6853	0.6788	0.6763	0.672	0.667	0.664	0.6612	0.6574	0.6532	0.6507	0.6463	0.6417	0.6389	0.636	0.6321	0.6279	0.6235	0.62	0.6162	0.6101	0.6082	0.6017	0.5998	0.5946	0.5907	0.5854	0.5812	0.5764	0.5723	0.5683	0.5636	0.5593
	0.7677	0.7522	0.7412	0.7348	0.7297	0.7244	0.7197	0.7164	0.7138	0.7083	0.7026	0.6973	0.6909	0.6845	0.6754	0.6708	0.6646	0.6595	0.6542	0.6511	0.6461	0.6432	0.6401	0.6379	0.6344	0.6319	0.6293	0.626	0.6218	0.6192	0.6155	0.6114	0.6076	0.6043	0.6003	0.5979	0.5938	0.5908	0.5859	0.5823	0.5787	0.5747	0.5708	0.567	0.5623	0.5587	0.5536	0.5507	0.5477
	0.7357	0.7325	0.728	0.721	0.7139	0.7071	0.699	0.6922	0.6827	0.6744	0.6653	0.6551	0.6472	0.6389	0.6312	0.6251	0.6192	0.6127	0.6062	0.601	0.5942	0.5873	0.5811	0.5755	0.5685	0.562	0.556	0.549	0.5419	0.5346	0.5278	0.5209	0.5133	0.5058	0.499	0.492	0.4831	0.4765	0.4683	0.4611	0.4536	0.4464	0.4384	0.4307	0.4223	0.4151	0.4064	0.3991	0.391
	0.7829	0.771	0.7592	0.7513	0.743	0.7354	0.7266	0.7167	0.7042	0.695	0.6826	0.6671	0.6539	0.6409	0.6295	0.6182	0.6078	0.5978	0.5889	0.581	0.5719	0.5626	0.5534	0.5446	0.5356	0.5258	0.5167	0.5063	0.4959	0.4857	0.4757	0.4645	0.4536	0.4428	0.4314	0.4216	0.4092	0.3986	0.3866	0.3754	0.3637	0.3514	0.3399	0.3278	0.3148	0.3039	0.2907	0.2792	0.2672
	0.8221	0.7992	0.7857	0.7756	0.7656	0.7533	0.7442	0.7339	0.7245	0.713	0.7042	0.6932	0.6828	0.6731	0.6616	0.6496	0.6367	0.6244	0.6099	0.5949	0.5774	0.5603	0.5432	0.5276	0.5135	0.4987	0.4851	0.4703	0.4571	0.4439	0.431	0.4169	0.4038	0.3893	0.3758	0.3621	0.3459	0.333	0.3179	0.3036	0.2884	0.2743	0.2594	0.2445	0.2289	0.2136	0.1982	0.1839	0.1685
	0.7893	0.779	0.769	0.7606	0.7525	0.7433	0.7352	0.7263	0.7193	0.7104	0.701	0.691	0.6797	0.6672	0.6528	0.6387	0.6266	0.614	0.6018	0.592	0.5811	0.5689	0.5576	0.5466	0.5367	0.5257	0.5147	0.5024	0.4915	0.4804	0.4683	0.4556	0.444	0.4316	0.4191	0.4079	0.3929	0.381	0.3684	0.3554	0.3416	0.3286	0.316	0.3022	0.2885	0.2741	0.2609	0.2483	0.2338
	0.7926	0.7829	0.7726	0.7644	0.7568	0.7492	0.7428	0.735	0.7286	0.7213	0.7135	0.7053	0.6966	0.6867	0.6769	0.6681	0.6591	0.6504	0.6425	0.6369	0.6296	0.6236	0.6162	0.611	0.6048	0.5981	0.5927	0.5847	0.5783	0.5711	0.5639	0.5576	0.5505	0.5431	0.5367	0.5302	0.5221	0.5145	0.5065	0.4996	0.4924	0.485	0.4778	0.4692	0.4609	0.4538	0.4458	0.4381	0.4303
	0.78	0.7618	0.75	0.7412	0.7312	0.7217	0.7119	0.7024	0.6935	0.6816	0.6734	0.6635	0.6544	0.6422	0.6303	0.6184	0.603	0.5885	0.5725	0.557	0.5395	0.5222	0.5053	0.4896	0.4748	0.4611	0.4464	0.4311	0.4183	0.404	0.3893	0.3742	0.3596	0.3451	0.3288	0.3147	0.2979	0.2835	0.2659	0.2504	0.2349	0.2188	0.2025	0.1862	0.1688	0.1531	0.1374	0.1216	0.1057
	0.7806	0.763	0.7498	0.7388	0.7282	0.7186	0.7071	0.6967	0.6871	0.6756	0.6649	0.6523	0.6398	0.6253	0.6087	0.5914	0.5739	0.558	0.541	0.5267	0.5105	0.4952	0.4808	0.4663	0.4523	0.436	0.4214	0.4055	0.3893	0.3746	0.358	0.3417	0.3244	0.3074	0.2902	0.2747	0.2556	0.2399	0.2209	0.2037	0.1864	0.1687	0.1507	0.1326	0.1151	0.0983	0.083	0.0712	0.0644
	0.7754	0.7598	0.7519	0.7457	0.7374	0.7291	0.7216	0.714	0.7066	0.6986	0.6899	0.6791	0.6693	0.6568	0.6443	0.6319	0.6192	0.6071	0.5946	0.5855	0.5747	0.5638	0.5537	0.545	0.5352	0.5261	0.515	0.5046	0.4936	0.4837	0.4719	0.462	0.4514	0.4394	0.4292	0.4184	0.406	0.3951	0.383	0.3718	0.3595	0.3482	0.3358	0.3248	0.3112	0.3	0.2875	0.2758	0.2637
	0.8418	0.8263	0.8201	0.8165	0.8147	0.8124	0.8109	0.8097	0.8093	0.8057	0.8039	0.8024	0.7995	0.7995	0.7952	0.7949	0.7912	0.7896	0.7862	0.7829	0.7776	0.7725	0.7674	0.7645	0.7608	0.7571	0.7559	0.7547	0.7532	0.7533	0.7529	0.752	0.751	0.7508	0.7502	0.7497	0.7489	0.7487	0.7477	0.7473	0.7475	0.7467	0.7463	0.7447	0.7443	0.7436	0.743	0.7439	0.7418
	0.7863	0.7838	0.7771	0.7756	0.7727	0.7694	0.7644	0.761	0.7565	0.7504	0.7466	0.7398	0.735	0.73	0.7255	0.7213	0.7178	0.7156	0.7129	0.7125	0.7102	0.7083	0.7065	0.7063	0.706	0.7036	0.7027	0.701	0.6988	0.6977	0.6966	0.6952	0.6934	0.6909	0.6902	0.6896	0.6867	0.6858	0.6826	0.681	0.6798	0.6782	0.6766	0.6742	0.6717	0.6712	0.6687	0.6661	0.6651
	0.8173	0.8072	0.8024	0.7989	0.7948	0.7918	0.7859	0.7805	0.7771	0.7702	0.7668	0.7611	0.7562	0.7519	0.7466	0.7418	0.736	0.7282	0.7199	0.714	0.7067	0.6988	0.6934	0.6891	0.6841	0.6795	0.6765	0.6716	0.6671	0.6644	0.6604	0.6568	0.6526	0.6483	0.6445	0.6409	0.6347	0.6324	0.6261	0.6236	0.6183	0.6142	0.6092	0.6053	0.6	0.5956	0.5915	0.5867	0.582
	0.7986	0.7925	0.7881	0.7842	0.7801	0.7752	0.7686	0.762	0.7594	0.7505	0.7449	0.7406	0.7354	0.7303	0.7263	0.7202	0.7153	0.7095	0.7032	0.6974	0.6892	0.6831	0.6776	0.6734	0.6685	0.6661	0.6616	0.6577	0.6544	0.6497	0.6463	0.6421	0.6383	0.6344	0.6304	0.6276	0.6234	0.6202	0.6151	0.6115	0.6076	0.6033	0.5994	0.5964	0.5915	0.5864	0.5826	0.5782	0.5747
	0.8088	0.8013	0.8017	0.7984	0.7943	0.7918	0.7871	0.7841	0.7799	0.7785	0.7761	0.7717	0.7701	0.7675	0.765	0.7635	0.7628	0.7608	0.7592	0.7587	0.7572	0.756	0.7552	0.7561	0.7555	0.7552	0.7555	0.7552	0.7545	0.7544	0.7539	0.7543	0.7535	0.7529	0.7533	0.7532	0.7519	0.7532	0.7517	0.7517	0.752	0.7512	0.7516	0.7517	0.7509	0.7511	0.7498	0.7506	0.7506
	0.83	0.8182	0.8239	0.8229	0.8205	0.8176	0.8152	0.8123	0.8091	0.8079	0.8054	0.8024	0.8004	0.7981	0.7956	0.7938	0.7917	0.7893	0.7871	0.7854	0.7823	0.78	0.7778	0.7764	0.7754	0.774	0.7736	0.7728	0.7718	0.7716	0.7719	0.771	0.7703	0.7709	0.7704	0.7712	0.77	0.7704	0.7692	0.7696	0.7701	0.7691	0.7689	0.7684	0.7678	0.7684	0.7669	0.7677	0.7679
	0.8084	0.8021	0.8072	0.8046	0.803	0.7991	0.7964	0.7942	0.7909	0.7884	0.7874	0.7837	0.7826	0.7809	0.7775	0.7757	0.7734	0.7713	0.7686	0.7672	0.7642	0.7629	0.7619	0.7615	0.7619	0.7609	0.7607	0.7593	0.7592	0.7595	0.7597	0.7593	0.7587	0.7586	0.7588	0.7589	0.7568	0.7583	0.7571	0.7574	0.757	0.7577	0.7569	0.7568	0.7561	0.7555	0.755	0.7561	0.756
	0.8154	0.8191	0.8191	0.8153	0.8129	0.8082	0.8068	0.8041	0.803	0.8017	0.7991	0.7974	0.7958	0.7946	0.7921	0.7905	0.7896	0.7871	0.7851	0.7848	0.7821	0.7782	0.7754	0.7736	0.7727	0.7705	0.7695	0.7684	0.7676	0.7678	0.7671	0.7661	0.7658	0.7656	0.7656	0.7662	0.7643	0.7651	0.7644	0.7644	0.7638	0.7637	0.764	0.7631	0.7629	0.7617	0.7619	0.763	0.7622
[truncated: 145 more columns]
