# Supplementary material for: Crystal structure of the full Swi2/Snf2 remodeler Mot1 in the resting state
Source: eLife. 2018 Oct 5;7:e37774. doi: 10.7554/eLife.37774 (PMC6188472; doi:10.7554/eLife.37774)
Supplement: Figure 2—source data 2. [file elife-37774-fig2-data2.xlsx]

## Sheet: Sheet1 (2)
Replicate I										normalized
						relative intensity		averages	stdev	averages	stdev
Sample	free DNA	TBP:DNA	Mot1:TBP:DNA	total lane		freeDNA/complexed		freeDNA/complexed	freeDNA/complexed	freeDNA/complexed	freeDNA/complexed
free DNA	28198924	1086192	410657	42016387		18.8389		17.2307	2.25561	1	0.130907
TBP:DNA	9200075	13654853	770314	45953482		0.637779		2.11853	1.20232	0.122951	0.0697777
Mot1 wt - comp. DNA	10206903	6920125	4781154	42024068		0.87229		1.29957	0.491517	0.0754217	0.0285257
Mot1 wt -ATP	10848903	5228640	2508841	35707136		1.40212		1.38379	0.620638	0.0803095	0.0360193
Mot1 wt +ATP	18065409	6656347	997314	46417056		2.36036		6.48254	4.34713	0.376221	0.25229
Mot1 ΔC -ATP	6772811	5517104	15732146	50129976		0.318732		0.915616	0.614494	0.0531387	0.0356628
Mot1 ΔC +ATP	16147560	4773154	8380004	49411997		1.22766		2.02685	0.889595	0.11763	0.0516285
Mot1 L1658A/Y1659A -ATP	13321196	8185882	3576376	46277349		1.13254		1.29811	0.681262	0.0753372	0.0395377
Mot1 L1658A/Y1659A +ATP	15886439	7803175	1102192	46103044		1.78392		6.18306	4.32016	0.35884	0.250725
Mot R4D -ATP	13300196	7934640	3686790	45235307		1.14445		1.37735	0.72799	0.0799357	0.0422496
Mot R4D +ATP	14455681	7141004	1237314	41468266		1.72537		5.32795	3.50701	0.309213	0.203533
Mot D1720R -ATP	13634489	8708175	4278912	48265985		1.04985		1.34692	0.741091	0.0781699	0.0430099
Mot D1720R +ATP	17926338	8294246	1270607	49014985		1.87419		6.16003	4.75593	0.357503	0.276015
	Replicate II
						relative intensity
Sample	free DNA	TBP:DNA	Mot1:TBP:DNA	total lane		freeDNA/complexed
free DNA	31062238	1281799	526435	42320650		17.1782
TBP:DNA	10907882	9663075	745971	37642558		1.04792
Mot1 wt - comp. DNA	8824933	8753953	2952962	37224458		0.753822
Mot1 wt -ATP	8482518	6064933	2227305	32494730		1.02295
Mot1 wt +ATP	17141317	4715861	1022607	38203981		2.98709
Mot1 ΔC -ATP	5205912	3748205	11104782	35695115		0.350496
Mot1 ΔC +ATP	12102711	3531376	6346175	37338236		1.22527
Mot1 L1658A/Y1659A -ATP	7572397	7019347	2605841	36345136		0.786727
Mot1 L1658A/Y1659A +ATP	12606711	3257205	655950	31347860		3.22162
Mot R4D -ATP	9430418	7050296	2659962	37056085		0.971181
Mot R4D +ATP	16006832	4565276	1115728	38304902		2.81761
Mot D1720R -ATP	8624175	7279175	2593255	37008905		0.873562
Mot D1720R +ATP	14785439	4986225	1094556	35976065		2.4315
	Replicate III
						relative intensity
Sample	free DNA	TBP:DNA	Mot1:TBP:DNA	total lane		freeDNA/complexed
free DNA	28040459	1053607	707506	41623253		15.922
TBP:DNA	7663347	6269468	655243	30754395		1.10667
Mot1 wt - comp. DNA	5823225	4557690	2037012	27743630		0.883016
Mot1 wt -ATP	7766296	5197933	2157598	30949692		1.05584
Mot1 wt +ATP	12866832	4199276	983192	34130780		2.48276
Mot1 ΔC -ATP	5021690	3044790	11503004	33078165		0.345186
Mot1 ΔC +ATP	9156589	3746033	4825397	31167851		1.06827
Mot1 L1658A/Y1659A -ATP	7451296	4780104	2168134	27449002		1.0724
Mot1 L1658A/Y1659A +ATP	13391024	4851518	1006728	33880538		2.28584
Mot R4D -ATP	8020246	4693518	2034719	26914487		1.19203
Mot R4D +ATP	13075489	4580933	957142	32456659		2.36102
Mot D1720R -ATP	6879882	4448518	2023305	25596558		1.06305
Mot D1720R +ATP	9983075	3858619	1066556	27479517		2.02695
	Replicate IV
						relative intensity
Sample	free DNA	TBP:DNA	Mot1:TBP:DNA	total lane		freeDNA/complexed
free DNA	25189681	917828	949071	37014555		13.4928
TBP:DNA	18915610	4508104	848728	37502011		3.53112
Mot1 wt - comp. DNA	13551246	1008728	7188368	31610718		1.65318
Mot1 wt -ATP	10497832	952406	7600439	28767194		1.22741
Mot1 wt +ATP	20777782	722071	927899	31637099		12.5928
Mot1 ΔC -ATP	8184347	695071	6799711	23998798		1.09201
Mot1 ΔC +ATP	16769589	1336971	5677882	34195839		2.39058
Mot1 L1658A/Y1659A -ATP	11021468	805536	7568439	29077668		1.31616
Mot1 L1658A/Y1659A +ATP	22220368	821607	999607	33807907		12.2009
Mot R4D -ATP	9853589	895485	6952317	26976647		1.25559
Mot R4D +ATP	13581882	837536	915142	24755664		7.74922
Mot D1720R -ATP	10941489	863071	6860853	27663517		1.41657
Mot D1720R +ATP	23884217	1059142	1086556	35574120		11.1312
	Replicate V
						relative intensity
Sample	free DNA	TBP:DNA	Mot1:TBP:DNA	total lane		freeDNA/complexed
free DNA	27527167	702314	896142	36119262		17.2211
TBP:DNA	17513560	4469518	951142	33070647		3.23089
Mot1 wt - comp. DNA	12888196	837778	7430560	28262810		1.55874
Mot1 wt -ATP	6909882	1023749	6887660	21427245		0.873407
Mot1 wt +ATP	17176803	1002778	1665920	27383969		6.4364
Mot1 ΔC -ATP	14979489	1325556	8114731	33471931		1.58676
Mot1 ΔC +ATP	14855388	1205192	3630397	28276203		3.07209
Mot1 L1658A/Y1659A -ATP	5639690	1063657	6691660	21569789		0.727203
Mot1 L1658A/Y1659A +ATP	14690024	1112607	1445335	25170141		5.74291
Mot R4D -ATP	6190589	1198021	7162024	22394345		0.740497
Mot R4D +ATP	15010903	1150778	1490142	26185927		5.68397
Mot D1720R -ATP	5518468	1354263	6094125	21682132		0.740894
Mot D1720R +ATP	15161752	1238607	1512314	26250333		5.51152
	Replicate VI
						relative intensity
Sample	free DNA	TBP:DNA	Mot1:TBP:DNA	total lane		freeDNA/complexed
free DNA	25824338	764364	481314	34080999		20.7312
TBP:DNA	17971631	5122832	570192	33404981		3.15678
Mot1 wt - comp. DNA	14985267	1726799	5490296	30582609		2.07636
Mot1 wt -ATP	17145974	902071	5399296	31519496		2.72099
Mot1 wt +ATP	25539066	928607	1193314	34064605		12.0358
Mot1 ΔC -ATP	13472560	1170021	6312589	27695475		1.80052
Mot1 ΔC +ATP	12492803	1426799	2505205	22782182		3.17721
Mot1 L1658A/Y1659A -ATP	15256196	862192	4678175	27400818		2.75364
Mot1 L1658A/Y1659A +ATP	19472095	766607	874778	26673078		11.8632
Mot R4D -ATP	16712338	890364	4755054	28264203		2.96034
Mot R4D +ATP	20944459	807263	993556	28199342		11.6305
Mot D1720R -ATP	17371338	936021	4977418	29043425		2.9376
Mot D1720R +ATP	26568338	899607	1000192	34361877		13.9848
