# Supplementary figures and images for: Crystal structure of the full Swi2/Snf2 remodeler Mot1 in the resting state
Source: eLife journal article supplement (doi:10.7554/elife.37774), 2018-10-05

**A**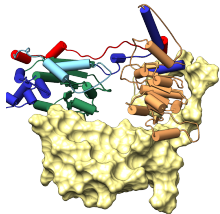

*ScChd1*  
3MWY  
inactive

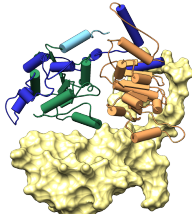

*ScChd1*  
509G  
active

**B**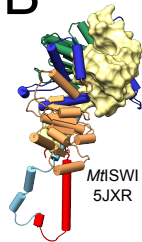

*MtlSWI*  
5JXR

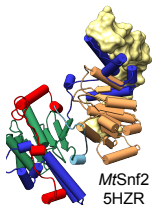

*MtSnf2*  
5HZR

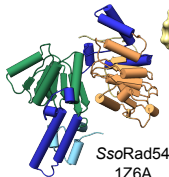

*SsoRad54*  
1Z6A

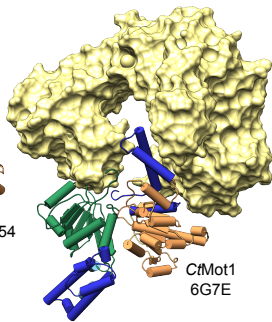

*CtMot1*  
6G7E

Supplement: supp [file elife_poa_e37774_Figure_1_figure_supplement_1.pdf › elife_poa_e37774_Figure_1_figure_supplement_1.pdf]

**A**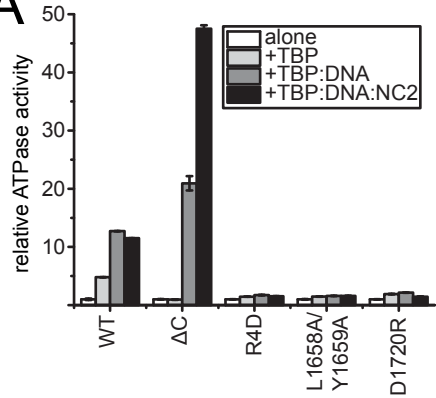**B**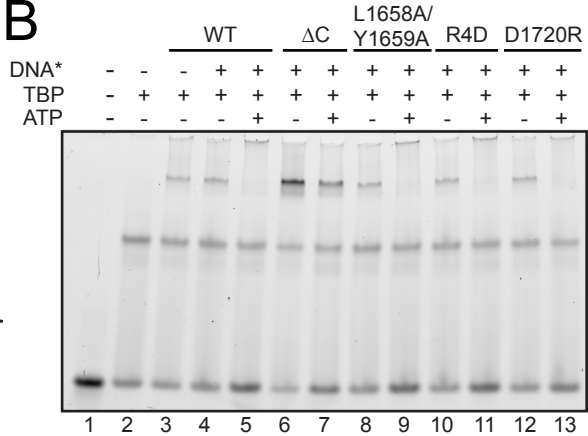**C**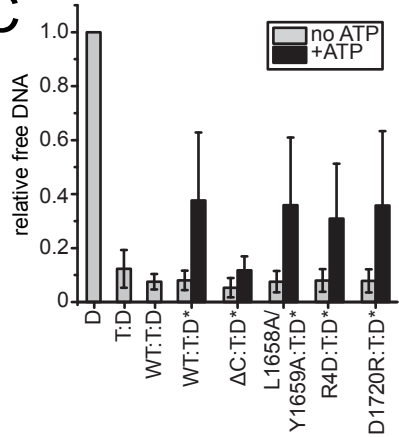

Supplement: supp [file elife_poa_e37774_Figure_2_figure_supplement_1.pdf › elife_poa_e37774_Figure_2_figure_supplement_1.pdf]
